# Supplementary material
Source: MDPI journal article supplement (https://www.mdpi.com/search?q=molbank-2021-M1263)
Supplement: s002 [file molbank-2021-M1263-s002-mod.mol]

  corina  07312115183D 1   1.00000     0.00000 
CORINA 4.3.0 0026  30.10.2019
 82 87  0  0  0  0  0  0  0  0999 V2000
    6.1431   -4.8690   -0.0866 N   0  0  0  0  0  0  0  0  0  0  0  0
    4.9390   -4.1727    0.0444 C   0  0  0  0  0  0  0  0  0  0  0  0
    7.3587   -4.1894    0.0235 C   0  0  0  0  0  0  0  0  0  0  0  0
    6.1315   -6.2451   -0.3279 C   0  0  0  0  0  0  0  0  0  0  0  0
    7.3236   -6.9167   -0.5749 C   0  0  0  0  0  0  0  0  0  0  0  0
    7.3143   -8.2744   -0.8131 C   0  0  0  0  0  0  0  0  0  0  0  0
    6.1086   -8.9742   -0.8058 C   0  0  0  0  0  0  0  0  0  0  0  0
    4.9144   -8.2990   -0.5574 C   0  0  0  0  0  0  0  0  0  0  0  0
    4.9286   -6.9421   -0.3149 C   0  0  0  0  0  0  0  0  0  0  0  0
    4.1309   -3.9678   -1.0682 C   0  0  0  0  0  0  0  0  0  0  0  0
    2.9429   -3.2801   -0.9412 C   0  0  0  0  0  0  0  0  0  0  0  0
    2.5518   -2.7904    0.3041 C   0  0  0  0  0  0  0  0  0  0  0  0
    3.3659   -2.9927    1.4176 C   0  0  0  0  0  0  0  0  0  0  0  0
    4.5508   -3.6851    1.2872 C   0  0  0  0  0  0  0  0  0  0  0  0
    7.7612   -3.3191   -0.9833 C   0  0  0  0  0  0  0  0  0  0  0  0
    8.9603   -2.6475   -0.8765 C   0  0  0  0  0  0  0  0  0  0  0  0
    9.7694   -2.8410    0.2422 C   0  0  0  0  0  0  0  0  0  0  0  0
    9.3637   -3.7138    1.2508 C   0  0  0  0  0  0  0  0  0  0  0  0
    8.1616   -4.3798    1.1425 C   0  0  0  0  0  0  0  0  0  0  0  0
    6.0962  -10.4353   -1.0624 C   0  0  0  0  0  0  0  0  0  0  0  0
    1.2739   -2.0497    0.4430 C   0  0  0  0  0  0  0  0  0  0  0  0
   11.0604   -2.1197    0.3589 C   0  0  0  0  0  0  0  0  0  0  0  0
    7.2932  -11.1090   -1.3172 C   0  0  0  0  0  0  0  0  0  0  0  0
    7.2913  -12.4672   -1.5518 C   0  0  0  0  0  0  0  0  0  0  0  0
    6.0981  -13.1756   -1.5473 C   0  0  0  0  0  0  0  0  0  0  0  0
    4.8876  -12.5074   -1.2975 C   0  0  0  0  0  0  0  0  0  0  0  0
    4.8943  -11.1306   -1.0547 C   0  0  0  0  0  0  0  0  0  0  0  0
    0.8885   -1.5584    1.6833 C   0  0  0  0  0  0  0  0  0  0  0  0
   -0.3195   -0.8659    1.8103 C   0  0  0  0  0  0  0  0  0  0  0  0
   -1.1278   -0.6639    0.6790 C   0  0  0  0  0  0  0  0  0  0  0  0
   -0.7266   -1.1562   -0.5548 C   0  0  0  0  0  0  0  0  0  0  0  0
    0.4623   -1.8429   -0.6751 C   0  0  0  0  0  0  0  0  0  0  0  0
   11.4680   -1.2503   -0.6558 C   0  0  0  0  0  0  0  0  0  0  0  0
   12.6637   -0.5725   -0.5530 C   0  0  0  0  0  0  0  0  0  0  0  0
   13.4783   -0.7561    0.5552 C   0  0  0  0  0  0  0  0  0  0  0  0
   13.0810   -1.6321    1.5793 C   0  0  0  0  0  0  0  0  0  0  0  0
   11.8649   -2.3138    1.4740 C   0  0  0  0  0  0  0  0  0  0  0  0
   -2.2980    0.0115    0.7925 O   0  0  0  0  0  0  0  0  0  0  0  0
   -0.7382   -0.3471    3.1183 C   0  0  0  0  0  0  0  0  0  0  0  0
   -1.7819    0.2620    3.2233 O   0  0  0  0  0  0  0  0  0  0  0  0
   -3.0685    0.1792   -0.3992 C   0  0  0  0  0  0  0  0  0  0  0  0
    6.1003  -14.5106   -1.7842 O   0  0  0  0  0  0  0  0  0  0  0  0
    7.3674  -15.1237   -2.0304 C   0  0  0  0  0  0  0  0  0  0  0  0
    3.6219  -13.2513   -1.2919 C   0  0  0  0  0  0  0  0  0  0  0  0
    3.6195  -14.4458   -1.5030 O   0  0  0  0  0  0  0  0  0  0  0  0
   14.6564   -0.0915    0.6494 O   0  0  0  0  0  0  0  0  0  0  0  0
   13.9388   -1.8310    2.7541 C   0  0  0  0  0  0  0  0  0  0  0  0
   14.9932   -1.2381    2.8425 O   0  0  0  0  0  0  0  0  0  0  0  0
   14.9962    0.7826   -0.4288 C   0  0  0  0  0  0  0  0  0  0  0  0
    8.2574   -6.3742   -0.5805 H   0  0  0  0  0  0  0  0  0  0  0  0
    8.2405   -8.7957   -1.0050 H   0  0  0  0  0  0  0  0  0  0  0  0
    3.9794   -8.8394   -0.5513 H   0  0  0  0  0  0  0  0  0  0  0  0
    4.0041   -6.4194   -0.1183 H   0  0  0  0  0  0  0  0  0  0  0  0
    4.4342   -4.3473   -2.0328 H   0  0  0  0  0  0  0  0  0  0  0  0
    2.3158   -3.1206   -1.8059 H   0  0  0  0  0  0  0  0  0  0  0  0
    3.0668   -2.6103    2.3823 H   0  0  0  0  0  0  0  0  0  0  0  0
    5.1799   -3.8453    2.1503 H   0  0  0  0  0  0  0  0  0  0  0  0
    7.1341   -3.1694   -1.8498 H   0  0  0  0  0  0  0  0  0  0  0  0
    9.2726   -1.9715   -1.6588 H   0  0  0  0  0  0  0  0  0  0  0  0
    9.9891   -3.8651    2.1182 H   0  0  0  0  0  0  0  0  0  0  0  0
    7.8451   -5.0528    1.9255 H   0  0  0  0  0  0  0  0  0  0  0  0
    8.2253  -10.5635   -1.3267 H   0  0  0  0  0  0  0  0  0  0  0  0
    8.2214  -12.9813   -1.7443 H   0  0  0  0  0  0  0  0  0  0  0  0
    3.9681  -10.6097   -0.8614 H   0  0  0  0  0  0  0  0  0  0  0  0
    1.5175   -1.7140    2.5472 H   0  0  0  0  0  0  0  0  0  0  0  0
   -1.3482   -1.0003   -1.4242 H   0  0  0  0  0  0  0  0  0  0  0  0
    0.7682   -2.2229   -1.6387 H   0  0  0  0  0  0  0  0  0  0  0  0
   10.8413   -1.1058   -1.5234 H   0  0  0  0  0  0  0  0  0  0  0  0
   12.9699    0.1008   -1.3401 H   0  0  0  0  0  0  0  0  0  0  0  0
   11.5521   -2.9886    2.2570 H   0  0  0  0  0  0  0  0  0  0  0  0
   -0.1149   -0.5039    3.9862 H   0  0  0  0  0  0  0  0  0  0  0  0
   -2.4831    0.7294   -1.1359 H   0  0  0  0  0  0  0  0  0  0  0  0
   -3.3326   -0.7987   -0.8018 H   0  0  0  0  0  0  0  0  0  0  0  0
   -3.9775    0.7349   -0.1689 H   0  0  0  0  0  0  0  0  0  0  0  0
    7.8261  -14.6697   -2.9088 H   0  0  0  0  0  0  0  0  0  0  0  0
    8.0154  -14.9786   -1.1661 H   0  0  0  0  0  0  0  0  0  0  0  0
    7.2271  -16.1906   -2.2043 H   0  0  0  0  0  0  0  0  0  0  0  0
    2.6929  -12.7350   -1.0999 H   0  0  0  0  0  0  0  0  0  0  0  0
   13.6309   -2.5053    3.5396 H   0  0  0  0  0  0  0  0  0  0  0  0
   14.2319    1.5536   -0.5262 H   0  0  0  0  0  0  0  0  0  0  0  0
   15.9602    1.2499   -0.2277 H   0  0  0  0  0  0  0  0  0  0  0  0
   15.0557    0.2109   -1.3550 H   0  0  0  0  0  0  0  0  0  0  0  0
  1  2  1  0      
  1  3  1  0      
  1  4  1  0      
  2 10  1  0      
  2 14  2  0      
  3 15  1  0      
  3 19  2  0      
  4  5  1  0      
  4  9  2  0      
  5  6  2  0      
  5 50  1  0      
  6  7  1  0      
  6 51  1  0      
  7  8  2  0      
  7 20  1  0      
  8  9  1  0      
  8 52  1  0      
  9 53  1  0      
 10 11  2  0      
 10 54  1  0      
 11 12  1  0      
 11 55  1  0      
 12 13  2  0      
 12 21  1  0      
 13 14  1  0      
 13 56  1  0      
 14 57  1  0      
 15 16  2  0      
 15 58  1  0      
 16 17  1  0      
 16 59  1  0      
 17 18  2  0      
 17 22  1  0      
 18 19  1  0      
 18 60  1  0      
 19 61  1  0      
 20 23  1  0      
 20 27  2  0      
 21 28  1  0      
 21 32  2  0      
 22 33  1  0      
 22 37  2  0      
 23 24  2  0      
 23 62  1  0      
 24 25  1  0      
 24 63  1  0      
 25 26  2  0      
 25 42  1  0      
 26 27  1  0      
 26 44  1  0      
 27 64  1  0      
 28 29  2  0      
 28 65  1  0      
 29 30  1  0      
 29 39  1  0      
 30 31  2  0      
 30 38  1  0      
 31 32  1  0      
 31 66  1  0      
 32 67  1  0      
 33 34  2  0      
 33 68  1  0      
 34 35  1  0      
 34 69  1  0      
 35 36  2  0      
 35 46  1  0      
 36 37  1  0      
 36 47  1  0      
 37 70  1  0      
 38 41  1  0      
 39 40  2  0      
 39 71  1  0      
 41 72  1  0      
 41 73  1  0      
 41 74  1  0      
 42 43  1  0      
 43 75  1  0      
 43 76  1  0      
 43 77  1  0      
 44 45  2  0      
 44 78  1  0      
 46 49  1  0      
 47 48  2  0      
 47 79  1  0      
 49 80  1  0      
 49 81  1  0      
 49 82  1  0      
M  END
$$$$
