# Supplementary material
Source: MDPI journal article supplement (https://www.mdpi.com/search?q=molbank-2021-M1263)
Supplement: s002 [file molbank-2021-M1263-s002.mol]

  Chem3D Core 19.107032116483D

 82 87  0  0  0  0  0  0  0  0999 V2000
   -2.2137   -0.4872    0.0025 N   0  0  0  0  0  0  0  0  0  0  0  0
   -2.7115    0.6703   -0.3044 C   0  0  0  0  0  0  0  0  0  0  0  0
   -0.9278   -0.6539    0.0287 C   0  0  0  0  0  0  0  0  0  0  0  0
   -3.0018   -1.4777    0.2851 C   0  0  0  0  0  0  0  0  0  0  0  0
   -2.6641   -2.5145    1.0819 C   0  0  0  0  0  0  0  0  0  0  0  0
   -3.4796   -3.5407    1.3782 C   0  0  0  0  0  0  0  0  0  0  0  0
   -4.7378   -3.6590    0.9062 C   0  0  0  0  0  0  0  0  0  0  0  0
   -5.0805   -2.6285    0.1059 C   0  0  0  0  0  0  0  0  0  0  0  0
   -4.2630   -1.6014   -0.1817 C   0  0  0  0  0  0  0  0  0  0  0  0
   -2.0905    1.5824   -1.0831 C   0  0  0  0  0  0  0  0  0  0  0  0
   -2.6053    2.7814   -1.4048 C   0  0  0  0  0  0  0  0  0  0  0  0
   -3.8071    3.2206   -0.9777 C   0  0  0  0  0  0  0  0  0  0  0  0
   -4.4320    2.3152   -0.1969 C   0  0  0  0  0  0  0  0  0  0  0  0
   -3.9160    1.1143    0.1152 C   0  0  0  0  0  0  0  0  0  0  0  0
   -0.3106   -1.8376   -0.1766 C   0  0  0  0  0  0  0  0  0  0  0  0
    1.0214   -2.0129   -0.1510 C   0  0  0  0  0  0  0  0  0  0  0  0
    1.9038   -1.0216    0.0902 C   0  0  0  0  0  0  0  0  0  0  0  0
    1.2945    0.1640    0.2972 C   0  0  0  0  0  0  0  0  0  0  0  0
   -0.0382    0.3345    0.2648 C   0  0  0  0  0  0  0  0  0  0  0  0
   -5.5691   -4.6982    1.1979 C   0  0  0  0  0  0  0  0  0  0  0  0
   -4.3330    4.4365   -1.2952 C   0  0  0  0  0  0  0  0  0  0  0  0
    3.2537   -1.2019    0.1215 C   0  0  0  0  0  0  0  0  0  0  0  0
   -6.8468   -4.7558    0.7687 C   0  0  0  0  0  0  0  0  0  0  0  0
   -7.6613   -5.7817    1.0526 C   0  0  0  0  0  0  0  0  0  0  0  0
   -7.2637   -6.8549    1.7563 C   0  0  0  0  0  0  0  0  0  0  0  0
   -6.0085   -6.8035    2.2545 C   0  0  0  0  0  0  0  0  0  0  0  0
   -5.2078   -5.7585    1.9555 C   0  0  0  0  0  0  0  0  0  0  0  0
   -3.6921    5.3629   -2.0412 C   0  0  0  0  0  0  0  0  0  0  0  0
   -4.1902    6.5747   -2.3709 C   0  0  0  0  0  0  0  0  0  0  0  0
   -5.4212    6.9473   -1.9506 C   0  0  0  0  0  0  0  0  0  0  0  0
   -6.0719    6.0346   -1.2053 C   0  0  0  0  0  0  0  0  0  0  0  0
   -5.5552    4.8374   -0.8918 C   0  0  0  0  0  0  0  0  0  0  0  0
    3.8377   -2.4095   -0.0170 C   0  0  0  0  0  0  0  0  0  0  0  0
    5.1665   -2.5890    0.0179 C   0  0  0  0  0  0  0  0  0  0  0  0
    6.0378   -1.5786    0.1914 C   0  0  0  0  0  0  0  0  0  0  0  0
    5.4814   -0.3538    0.3316 C   0  0  0  0  0  0  0  0  0  0  0  0
    4.1415   -0.1978    0.2947 C   0  0  0  0  0  0  0  0  0  0  0  0
   -5.9480    8.1760   -2.2733 O   0  0  0  0  0  0  0  0  0  0  0  0
   -3.4164    7.4027   -3.1342 C   0  0  0  0  0  0  0  0  0  0  0  0
   -3.6680    8.5171   -3.5381 O   0  0  0  0  0  0  0  0  0  0  0  0
   -7.2301    8.5317   -1.8102 C   0  0  0  0  0  0  0  0  0  0  0  0
   -8.1663   -7.8484    2.0484 O   0  0  0  0  0  0  0  0  0  0  0  0
   -8.3435   -8.7833    1.0081 C   0  0  0  0  0  0  0  0  0  0  0  0
   -5.5374   -7.8152    3.0409 C   0  0  0  0  0  0  0  0  0  0  0  0
   -4.4345   -7.8905    3.5381 O   0  0  0  0  0  0  0  0  0  0  0  0
    7.4037   -1.7411    0.2322 O   0  0  0  0  0  0  0  0  0  0  0  0
    6.2834    0.7369    0.5107 C   0  0  0  0  0  0  0  0  0  0  0  0
    5.9218    1.8857    0.6480 O   0  0  0  0  0  0  0  0  0  0  0  0
    7.9567   -3.0297    0.1031 C   0  0  0  0  0  0  0  0  0  0  0  0
   -1.6960   -2.5310    1.6133 H   0  0  0  0  0  0  0  0  0  0  0  0
   -3.0380   -4.2712    2.0723 H   0  0  0  0  0  0  0  0  0  0  0  0
   -6.0565   -2.5750   -0.3990 H   0  0  0  0  0  0  0  0  0  0  0  0
   -4.6712   -0.8822   -0.9138 H   0  0  0  0  0  0  0  0  0  0  0  0
   -1.1310    1.3481   -1.5774 H   0  0  0  0  0  0  0  0  0  0  0  0
   -1.9663    3.3717   -2.0784 H   0  0  0  0  0  0  0  0  0  0  0  0
   -5.4093    2.5132    0.2679 H   0  0  0  0  0  0  0  0  0  0  0  0
   -4.5223    0.5261    0.8267 H   0  0  0  0  0  0  0  0  0  0  0  0
   -0.8851   -2.7356   -0.4653 H   0  0  0  0  0  0  0  0  0  0  0  0
    1.3395   -3.0415   -0.3774 H   0  0  0  0  0  0  0  0  0  0  0  0
    1.8528    1.0795    0.5436 H   0  0  0  0  0  0  0  0  0  0  0  0
   -0.3763    1.3509    0.5339 H   0  0  0  0  0  0  0  0  0  0  0  0
   -7.3211   -3.9622    0.1734 H   0  0  0  0  0  0  0  0  0  0  0  0
   -8.7037   -5.7474    0.6888 H   0  0  0  0  0  0  0  0  0  0  0  0
   -4.1927   -5.8024    2.3686 H   0  0  0  0  0  0  0  0  0  0  0  0
   -2.6840    5.1439   -2.4179 H   0  0  0  0  0  0  0  0  0  0  0  0
   -7.0818    6.2464   -0.8179 H   0  0  0  0  0  0  0  0  0  0  0  0
   -6.2205    4.2095   -0.2814 H   0  0  0  0  0  0  0  0  0  0  0  0
    3.2655   -3.3383   -0.1572 H   0  0  0  0  0  0  0  0  0  0  0  0
    5.5273   -3.6236   -0.1016 H   0  0  0  0  0  0  0  0  0  0  0  0
    3.7751    0.8299    0.4071 H   0  0  0  0  0  0  0  0  0  0  0  0
   -2.4184    6.9916   -3.4226 H   0  0  0  0  0  0  0  0  0  0  0  0
   -7.4507    9.5571   -2.1832 H   0  0  0  0  0  0  0  0  0  0  0  0
   -7.9991    7.8427   -2.2254 H   0  0  0  0  0  0  0  0  0  0  0  0
   -7.2484    8.5596   -0.6979 H   0  0  0  0  0  0  0  0  0  0  0  0
   -8.7582   -8.2815    0.1057 H   0  0  0  0  0  0  0  0  0  0  0  0
   -7.3723   -9.2706    0.7665 H   0  0  0  0  0  0  0  0  0  0  0  0
   -9.0634   -9.5571    1.3562 H   0  0  0  0  0  0  0  0  0  0  0  0
   -6.2385   -8.6572    3.2432 H   0  0  0  0  0  0  0  0  0  0  0  0
    7.3818    0.5479    0.5318 H   0  0  0  0  0  0  0  0  0  0  0  0
    7.7086   -3.4604   -0.8925 H   0  0  0  0  0  0  0  0  0  0  0  0
    9.0634   -2.9309    0.1699 H   0  0  0  0  0  0  0  0  0  0  0  0
    7.6176   -3.6825    0.9381 H   0  0  0  0  0  0  0  0  0  0  0  0
  1  2  1  0      
  1  3  1  0      
  1  4  1  0      
  2 10  1  0      
  2 14  2  0      
  3 15  1  0      
  3 19  2  0      
  4  5  1  0      
  4  9  2  0      
  5  6  2  0      
  5 50  1  0      
  6  7  1  0      
  6 51  1  0      
  7  8  2  0      
  7 20  1  0      
  8  9  1  0      
  8 52  1  0      
  9 53  1  0      
 10 11  2  0      
 10 54  1  0      
 11 12  1  0      
 11 55  1  0      
 12 13  2  0      
 12 21  1  0      
 13 14  1  0      
 13 56  1  0      
 14 57  1  0      
 15 16  2  0      
 15 58  1  0      
 16 17  1  0      
 16 59  1  0      
 17 18  2  0      
 17 22  1  0      
 18 19  1  0      
 18 60  1  0      
 19 61  1  0      
 20 23  1  0      
 20 27  2  0      
 21 28  1  0      
 21 32  2  0      
 22 33  1  0      
 22 37  2  0      
 23 24  2  0      
 23 62  1  0      
 24 25  1  0      
 24 63  1  0      
 25 26  2  0      
 25 42  1  0      
 26 27  1  0      
 26 44  1  0      
 27 64  1  0      
 28 29  2  0      
 28 65  1  0      
 29 30  1  0      
 29 39  1  0      
 30 31  2  0      
 30 38  1  0      
 31 32  1  0      
 31 66  1  0      
 32 67  1  0      
 33 34  2  0      
 33 68  1  0      
 34 35  1  0      
 34 69  1  0      
 35 36  2  0      
 35 46  1  0      
 36 37  1  0      
 36 47  1  0      
 37 70  1  0      
 38 41  1  0      
 39 40  2  0      
 39 71  1  0      
 41 72  1  0      
 41 73  1  0      
 41 74  1  0      
 42 43  1  0      
 43 75  1  0      
 43 76  1  0      
 43 77  1  0      
 44 45  2  0      
 44 78  1  0      
 46 49  1  0      
 47 48  2  0      
 47 79  1  0      
 49 80  1  0      
 49 81  1  0      
 49 82  1  0      
M  END
